# Supplementary material for: Molecular Analysis, Pathogenic Mechanisms, and Readthrough Therapy on a Large Cohort of Kabuki Syndrome Patients
Source: PubMed Central journal article supplement (PMC4234006; doi:10.1002/humu.22547), 2014-03-13
Supplement: humu0035-0841-SD2.pdf [file humu0035-0841-SD2.pdf]

A

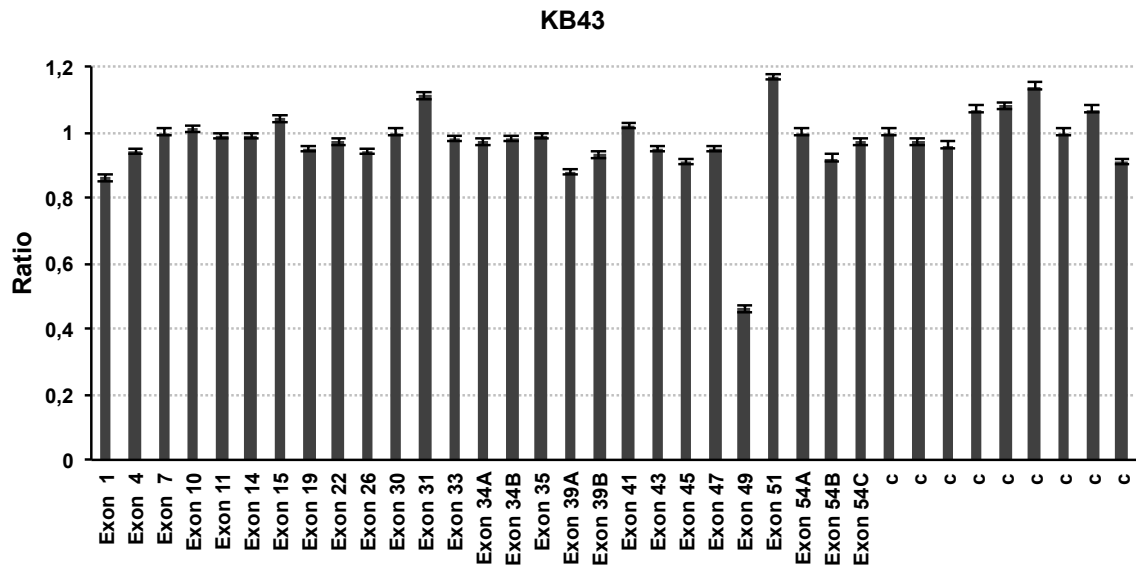

B

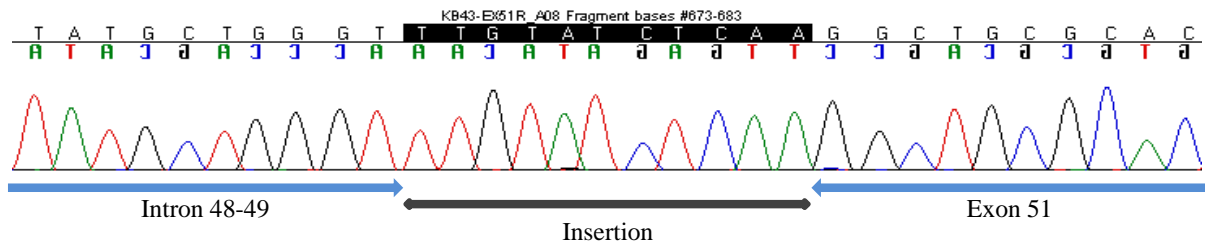

**Supp. Figure S1.** MLPA analysis of KMT2D gene. (A) Deletion of exon 49 was detected in the KB43 patient. (B) The electropherogram showing the boundaries of the deletion c.15785-238\_16168del12425. An insertion of 10 nucleotides, TTGTATCTCAA, was identified between intron 48-49 and exon 51 (highlighted in black).

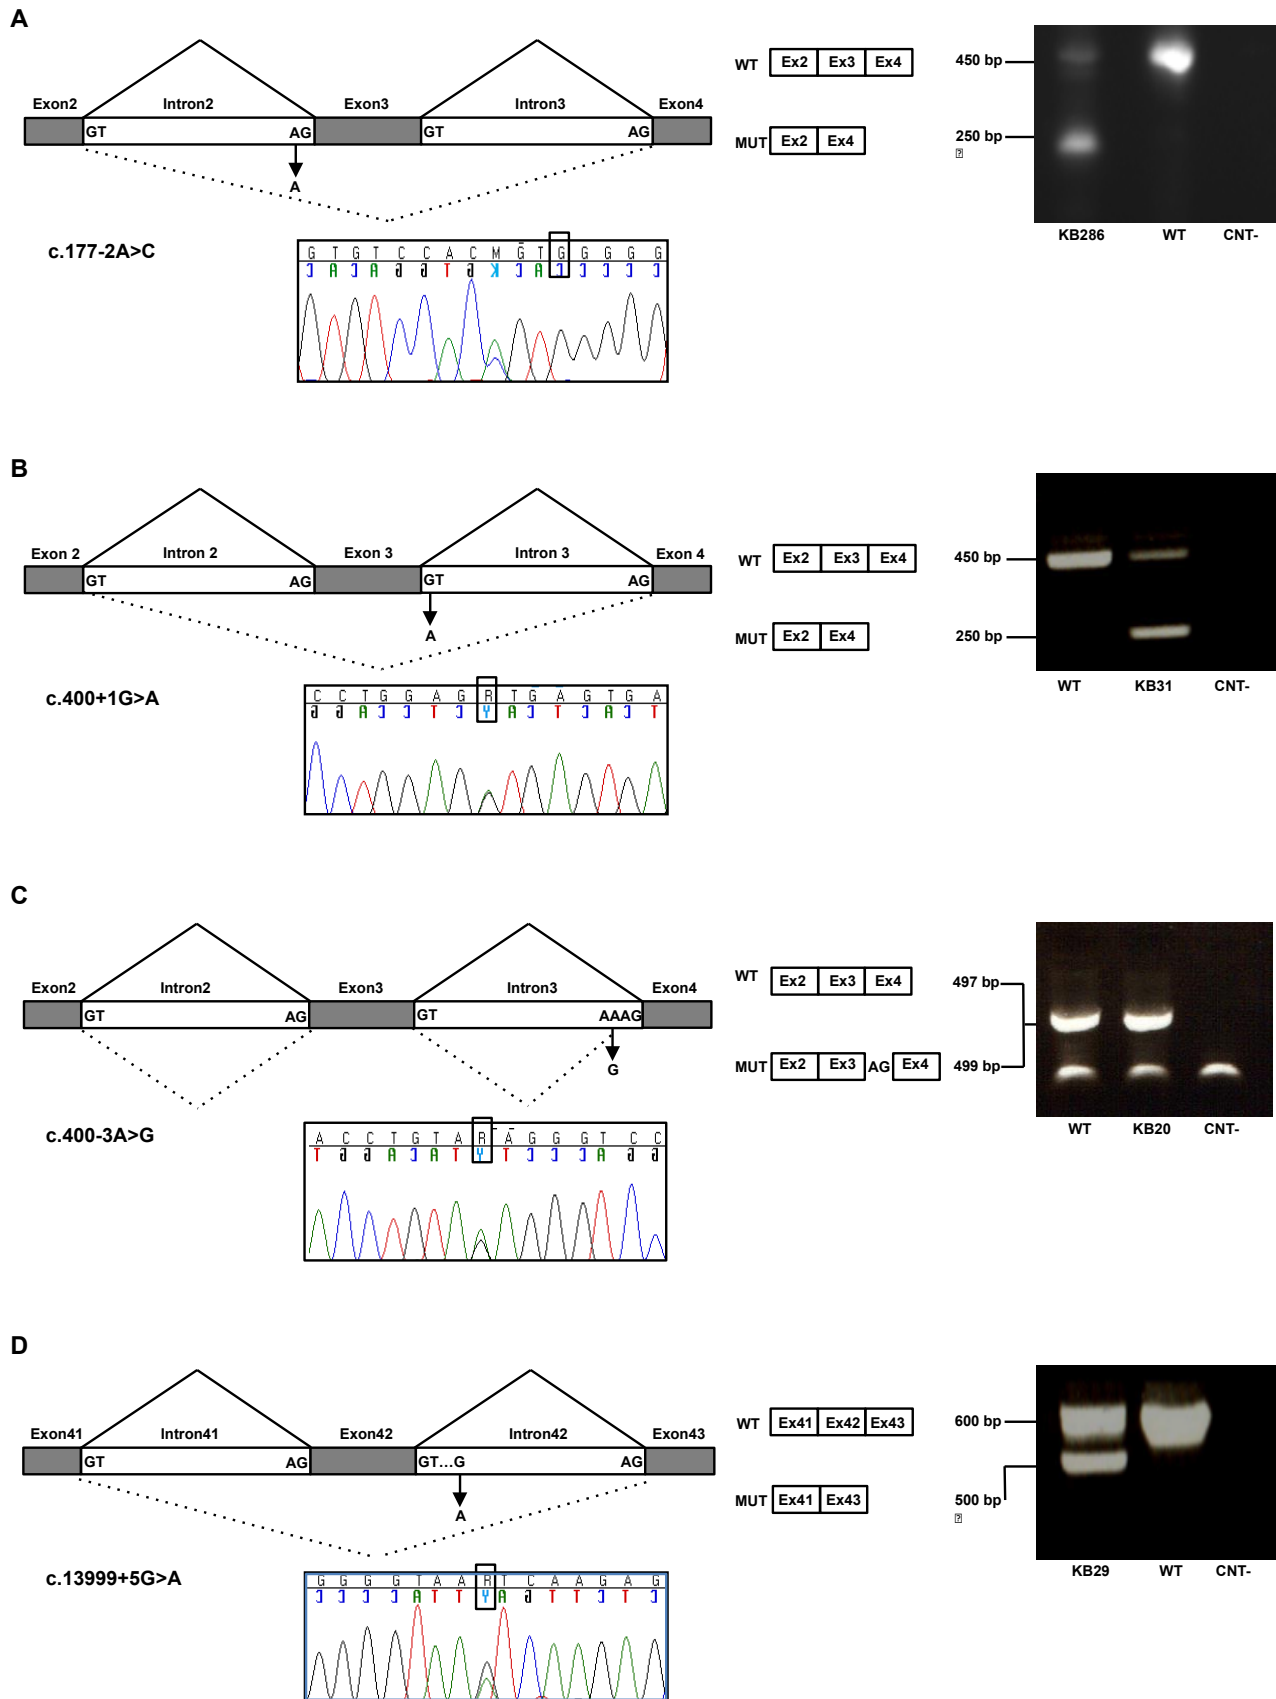

Supp. Figure S2

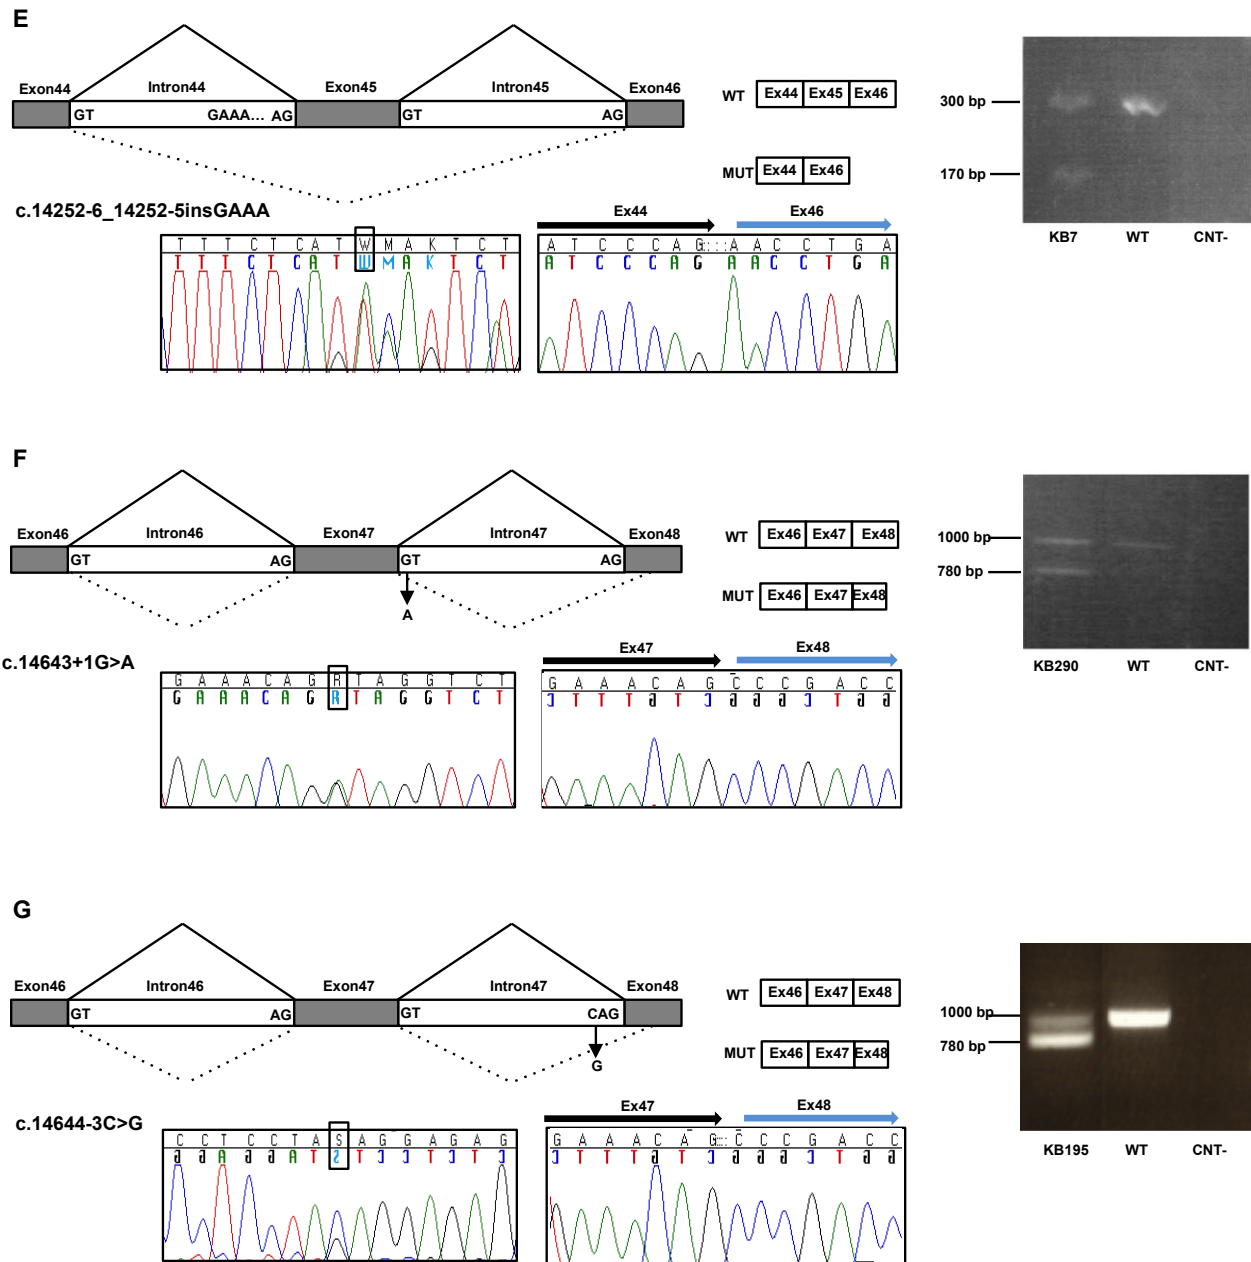

**Supp. Figure S2.** Schematic representation of KMT2D splicing mutations and their effect on cDNA patients. The electropherograms showing the KMT2D splicing heterozygous mutations in Kabuki patients are reported. RT-PCR analysis on cDNA from Kabuki patients and control (wt: wild type) are showed. Agarose gel images of PCR products showed both normal and aberrant spliced products. Patient cDNAs were used as templates for PCR amplifications in the regions displaying splicing mutations. See text for additional details.

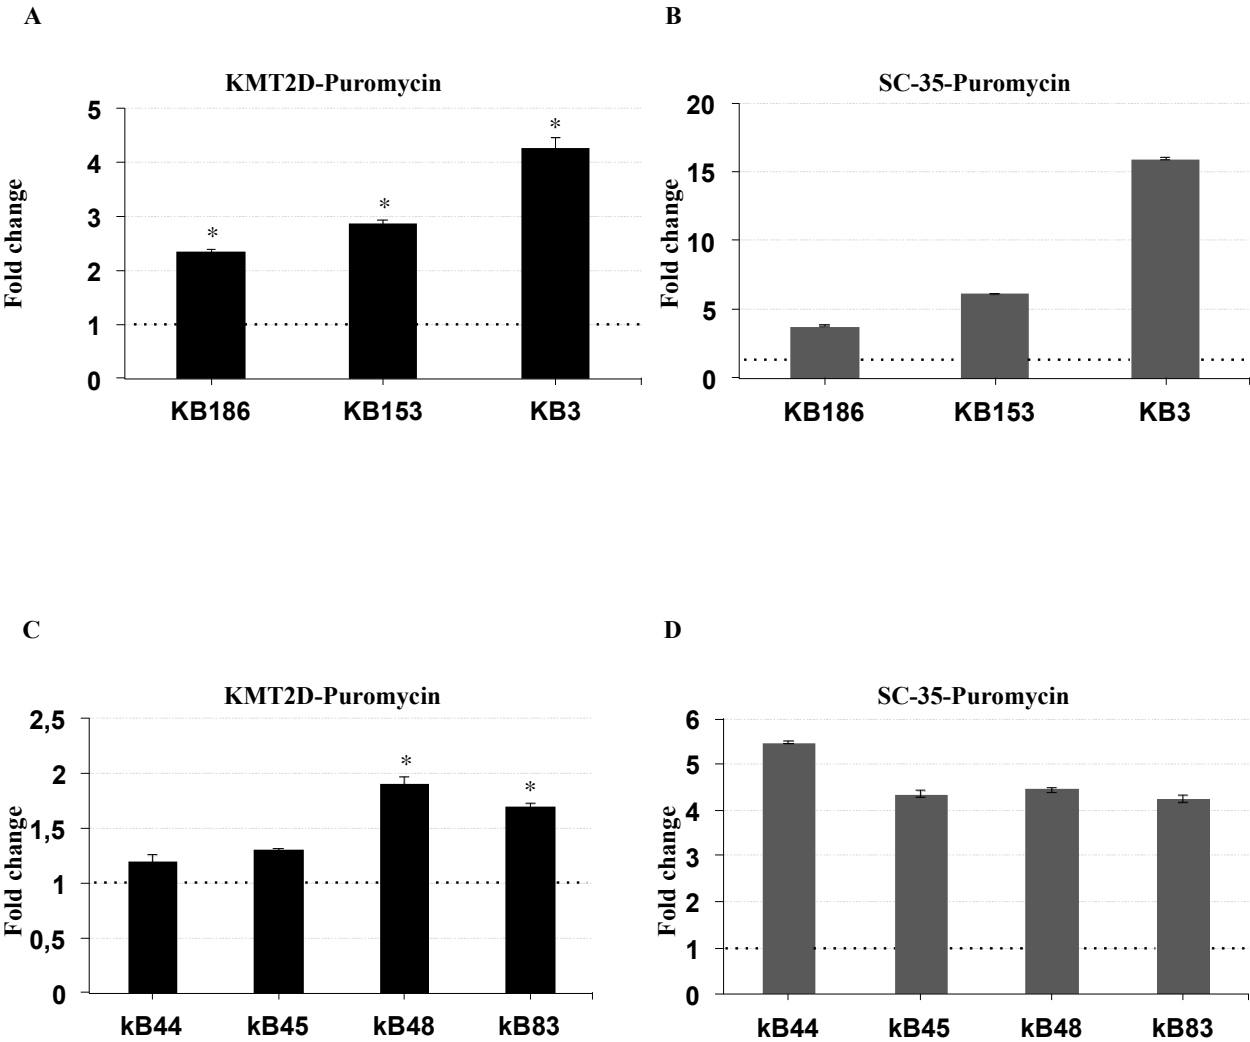

Supp. Figure S3

E

Normal control cDNA reverse

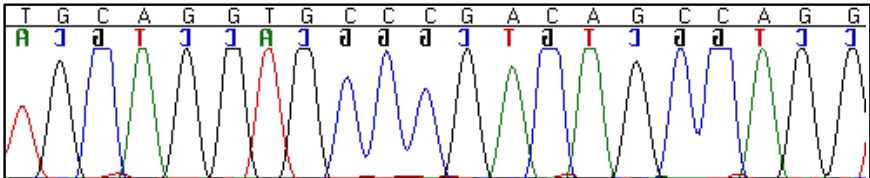

KB186 cDNA without puromycin reverse

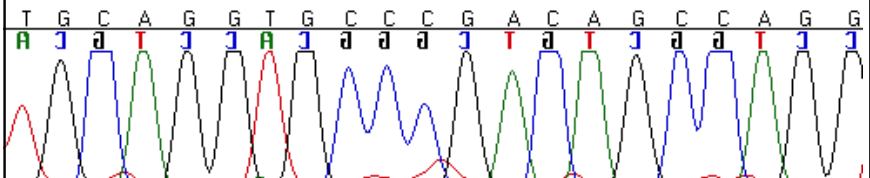

KB186 cDNA with puromycin reverse

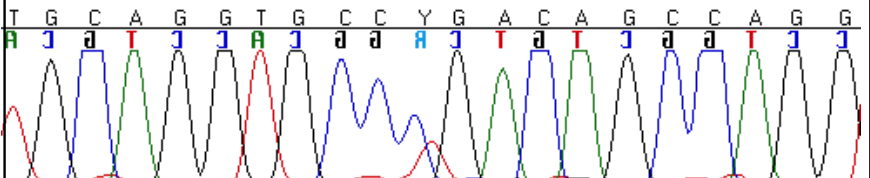

Normal control cDNA forward

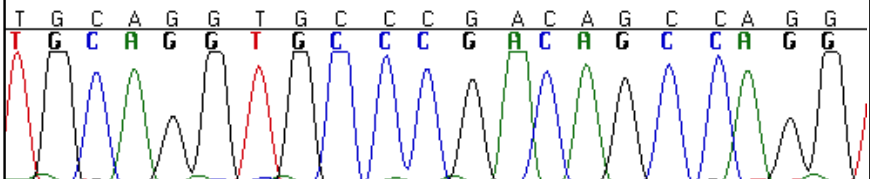

KB186 cDNA without puromycin forward

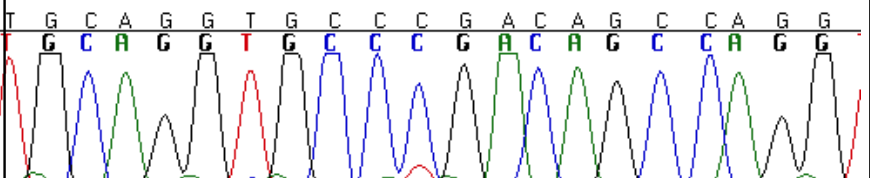

KB186 cDNA with puromycin forward

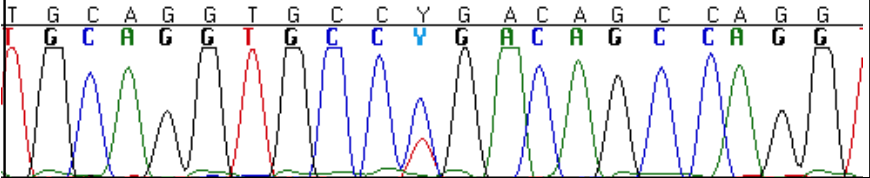

Supp. Figure S3

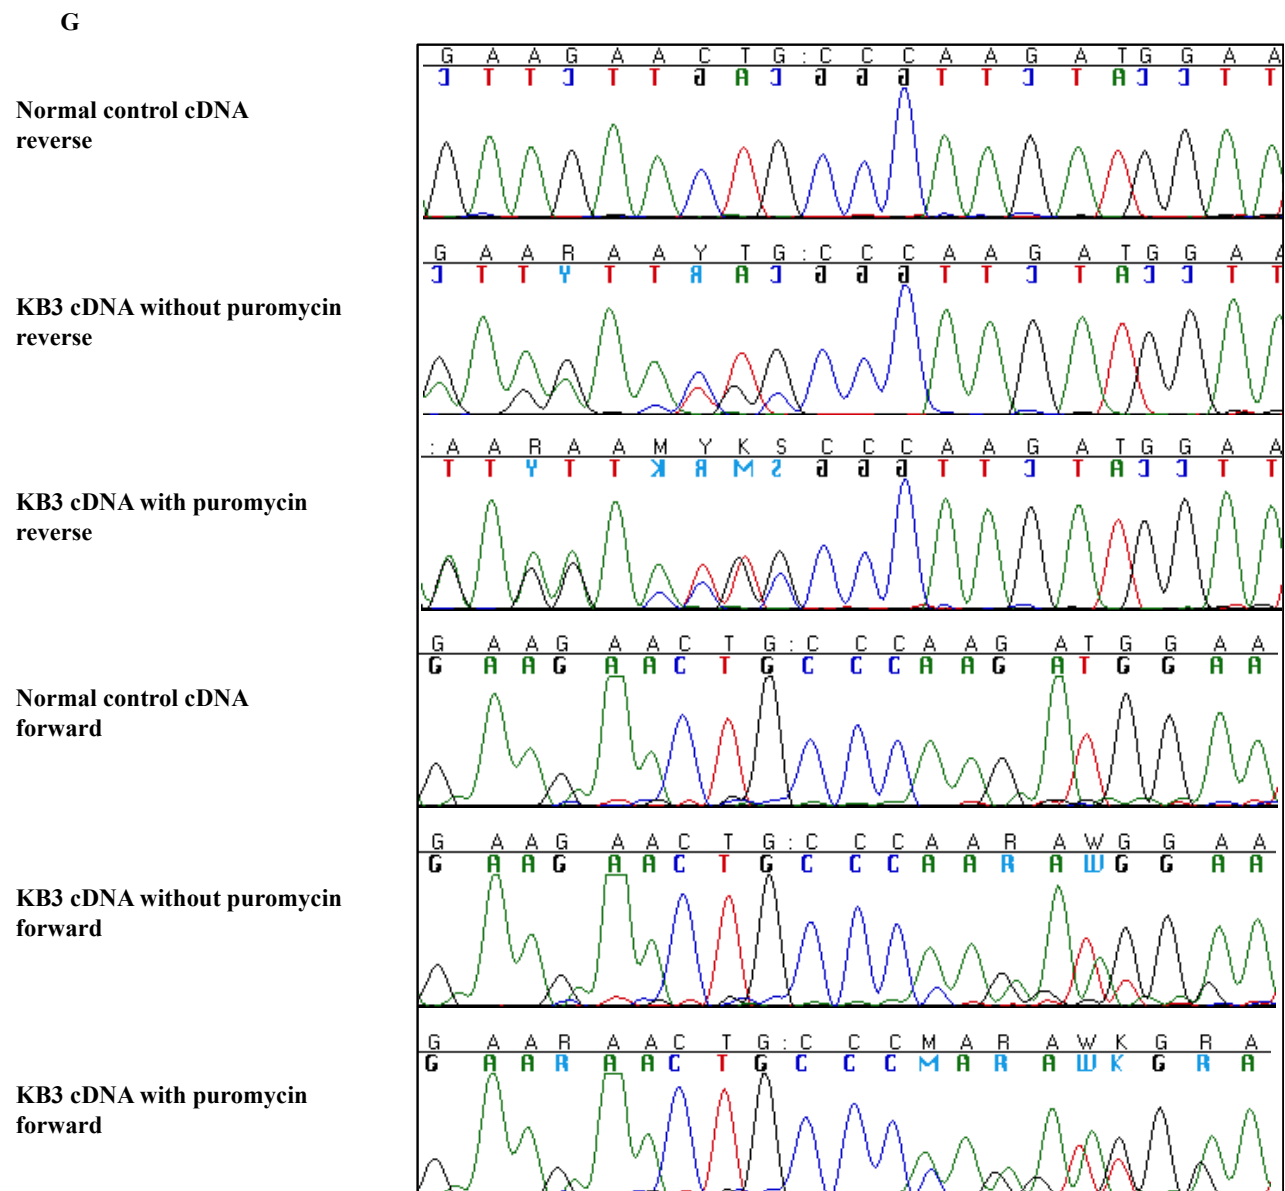

**Supp. Figure S3.** KMT2D mutations are regulated by NMD. (A-D) The mRNA levels of KMT2D in 3 KS-fibroblast and 4 KS-lymphoblastoid cell lines following treatment with puromycin (200ug/ml for 8 hours) were detected by using qPCR. The physiological NMD substrate SC-35 1.7 Kb was included as positive control.\* P value<0.05. (E-G) In the presence of puromycin, the KMT2D mutant alleles (c.9961C>T, KB186 (E), c.7903C>T, KB153 (F); and c.5652dup, KB3 (G)) were restored. Without puromycin the mutant alleles were observed at a lower level than the wild type allele.

**Supp. Table S1. KMT2D and KDM6A mutations identified in our cohort of Kabuki patients**

| Mutation Type                        | ID                | Exon/Intron | Mutation                              | AA change                | Inheritance          | Reference         |                   |
|--------------------------------------|-------------------|-------------|---------------------------------------|--------------------------|----------------------|-------------------|-------------------|
| <b>Patients with KMT2D mutations</b> |                   |             |                                       |                          |                      |                   |                   |
| <b>Nonsense</b>                      | KB49              | 5           | c.669T>G                              | p.Tyr223X                | NA                   | 4, #              |                   |
|                                      | KB35              | 10          | c.1921G>T                             | p.Glu641X                | NA                   | 4, #              |                   |
|                                      | KB33              | 16          | c.4419G>A                             | p.Trp1473X               | NA                   | 4, #              |                   |
|                                      | KB63              | 19          | c.4895delC                            | p.Ser1632X               | NA                   | 4, #              |                   |
|                                      | KB317             | 22          | c.5212G>T                             | p.Glu1738X               | NA                   | <b>This Study</b> |                   |
|                                      | KB262             | 26          | c.5674C>T                             | p.Gln1892X               | NA                   | <b>This Study</b> |                   |
|                                      | KB26              | 31          | c.6295 C>T                            | p.Arg2099X               | NA                   | 1, 4, #           |                   |
|                                      | KB66              | 31          | c.7246C>T                             | p.Gln2416X               | NA                   | 4, #              |                   |
|                                      | KB59              | 31          | c.7903C>T                             | p.Arg2635X               | de novo              | 4, #              |                   |
|                                      | KB153, KB226      | 31          | c.7903C>T                             | p.Arg2635X               | de novo, de novo     | 4                 |                   |
|                                      | KB198             | 31          | c.7936G>T                             | p.Glu2646X               | de novo              | <b>This Study</b> |                   |
|                                      | KB323             | 33          | c.8311C>T                             | p.Arg2771X               | NA                   | 2,7               |                   |
|                                      | KB289             | 34          | c.8743C>T                             | p.Arg2915X               | NA                   | 3                 |                   |
|                                      | KB186             | 34          | c.9961C>T                             | p.Arg3321X               | de novo              | 1, 5, 7           |                   |
|                                      | KB56              | 34          | c.10135C>T                            | p.Gln3379X               | de novo              | 4, #              |                   |
|                                      | KB168             | 39          | c.10750C>T                            | p.Gln3584X               | de novo              | <b>This Study</b> |                   |
|                                      | KB46              | 39          | c.10841C>G                            | p.Ser3614X               | de novo              | 4, #              |                   |
|                                      | KB41, KB44        | 39          | c.11119C>T                            | p.Arg3707X               | NA, NA               | 4, #              |                   |
|                                      | KB42              | 39          | c.11269C>T                            | p.Gln3757X               | de novo              | 4, #              |                   |
|                                      | KB25              | 39          | c.11434C>T                            | p.Gln3812X               | NA                   | 4, #              |                   |
|                                      | KB244             | 39          | c.11674C>T                            | p.Gln3892X               | NA                   | 7                 |                   |
|                                      | KB178             | 39          | c.11704C>T                            | p.Gln3902X               | NA                   | <b>This Study</b> |                   |
|                                      | KB181             | 39          | c.11869C>T                            | p.Gln3957X               | NA                   | <b>This Study</b> |                   |
|                                      | KB65              | 39          | c.12076C>T                            | p.Gln4026X               | NA                   | 4, #              |                   |
|                                      | KB40              | 39          | c.12274C>T                            | p.Gln4092X               | NA                   | 4, #              |                   |
|                                      | KB114             | 39          | c.12274C>T                            | p.Gln4092X               | de novo              | 4                 |                   |
|                                      | KB82              | 39          | c.12844C>T                            | p.Arg4282X               | de novo              | <b>This Study</b> |                   |
|                                      | KB189             | 39          | c.12955A>T                            | p.Arg4319X               | de novo              | <b>This Study</b> |                   |
|                                      | KB183             | 39          | c.13450C>T                            | p.Arg4484X               | de novo              | 2, 9              |                   |
|                                      | KB175             | 39          | c.13507C>T                            | p.Gln4503X               | de novo              | <b>This Study</b> |                   |
|                                      | KB73              | 40          | c.13666A>T                            | p.Lys4556X               | de novo              | 4, #              |                   |
|                                      | KB83              | 48          | c.15022G>T                            | p.Glu5008X               | NA                   | <b>This Study</b> |                   |
|                                      | KB45, KB72        | 48          | c.15079C>T                            | p.Arg5027X               | NA, NA               | 2, 4, #           |                   |
|                                      | KB130             | 52          | c.16360C>T                            | p.Arg5454X               | NA                   | 1, 2, 5           |                   |
|                                      | <b>Frameshift</b> | KB75        | 4                                     | c.472delT                | p.Cys158ValfsX50     | NA                | 4, #              |
|                                      |                   | KB8         | 5                                     | c.588delC                | p.Cys197AlafsX11     | NA                | 9                 |
|                                      |                   | KB58        | 6                                     | c.705delA                | p.Glu237SerfsX24     | NA                | 4, #              |
|                                      |                   | KB57        | 8                                     | c.1035_1036delCT         | p.Cys346SerfsX17     | NA                | 4, #, 6*          |
|                                      |                   | KB89        | 10                                    | c.1345_1346delCT         | p.Leu449ValfsX5      | NA                | 4, #              |
|                                      |                   | KB156       | 10                                    | c.1503dupT               | p.Pro502SerfsX7      | de novo           | <b>This Study</b> |
|                                      |                   | KB116       | 10                                    | c.1634delT               | p.Leu545ArgfsX385    | NA                | 7                 |
|                                      |                   | KB48        | 11                                    | c.2993dupC               | p.Met999TyrfsX69     | de novo           | 4, #              |
|                                      |                   | KB203       | 11                                    | c.3161_3171delCGTTGAGTCC | p.Pro1054HisfsX10    | NA                | <b>This Study</b> |
|                                      |                   | KB309       | 11                                    | c.3730delG               | p.Val1244SerfsX86    | NA                | <b>This Study</b> |
|                                      |                   | KB142       | 13                                    | c.4021delG               | p.Val1341LeufsX35    | de novo           | <b>This Study</b> |
|                                      |                   | KB311       | 14                                    | c.4135_4136delAT         | p.Met1379ValfsX52    | NA                | <b>This Study</b> |
|                                      |                   | KB188       | 16                                    | c.4454delC               | p.Pro1485LeufsX21    | de novo           | <b>This Study</b> |
| KB159                                |                   | 19          | c.4896_4905delAGATGCCCTT              | p.Asp1633AlafsX86        | NA                   | <b>This Study</b> |                   |
| KB3                                  |                   | 26          | c.5652dupC                            | p.Lys1885GlnfsX18        | NA                   | 9, #              |                   |
| KB84                                 |                   | 26          | c.5779delC                            | p.Gln1927LysfsX120       | NA                   | 4, #              |                   |
| KB146                                |                   | 27          | c.5857delC                            | p.Leu1953TrpfsX94        | de novo              | <b>This Study</b> |                   |
| KB208                                |                   | 28          | c.5954delC                            | p.Thr1985LysfsX62        | de novo              | <b>This Study</b> |                   |
| KB221                                |                   | 29          | c.6149_6150delGA                      | p.Arg2050LysfsX6         | de novo              | <b>This Study</b> |                   |
| KB152                                |                   | 31          | c.6583delA                            | p.Thr2195ProfsX69        | de novo              | <b>This Study</b> |                   |
| KB267                                |                   | 31          | c.6594delC                            | p.Tyr2199IlefsX65        | NA                   | 5                 |                   |
| KB79, KB102                          |                   | 31          | c.6595delT                            | p.Tyr2199IlefsX65        | de novo, de novo     | 1, 3, 4, 5, 7, #  |                   |
| KB67                                 |                   | 31          | c.6638_6641delGCGC                    | p.Gly2213AlafsX50        | de novo              | 4, #              |                   |
| KB176                                |                   | 31          | c.6738delA                            | p.Lys2246AsnfsX18        | NA                   | <b>This Study</b> |                   |
| KB253                                |                   | 31          | c.6794delG                            | p.Gly2265GlnfsX21        | NA                   | <b>This Study</b> |                   |
| KB278                                |                   | 31          | c.7481dupT                            | p.Ala2496SerfsX10        | NA                   | <b>This Study</b> |                   |
| KB313                                |                   | 32          | c.8196delG                            | p.Ser2733ValfsX24        | NA                   | <b>This Study</b> |                   |
| KB80                                 |                   | 33          | c.8273delG                            | p.Gly2758AlafsX29        | NA                   | 4, #              |                   |
| KB243                                |                   | 34          | c.8430_8431insAA                      | p.Gln2811AsnfsX41        | de novo              | <b>This Study</b> |                   |
| KB182                                |                   | 34          | c.9203delA                            | p.Gln3068GlyfsX3         | NA                   | <b>This Study</b> |                   |
| KB30                                 |                   | 38          | c.10606delC                           | p.Arg3536AlafsX122       | NA                   | 4, #              |                   |
| KB101                                |                   | 39          | c.11066_11078delCTGGATCCCTGGC         | p.Ala3689ValfsX56        | de novo              | 4, #              |                   |
| KB172                                |                   | 39          | c.12647delC                           | p.Pro4216LeufsX62        | NA                   | <b>This Study</b> |                   |
| KB192                                |                   | 39          | c.12966delA                           | p.Gln4322HisfsX62        | de novo              | <b>This Study</b> |                   |
| KB54                                 |                   | 39          | c.13129dupT                           | p.Trp4377LeufsX33        | NA                   | 4, #              |                   |
| KB121                                |                   | 39          | c.13277dupT                           | p.Ala4428SerfsX59        | de novo              | <b>This Study</b> |                   |
| KB123                                |                   | 42          | c.13884dupC                           | p.Thr4629HisfsX18        | de novo              | <b>This Study</b> |                   |
| KB197                                |                   | 47          | c.14592dupG                           | p.Pro4865AlafsX48        | de novo              | <b>This Study</b> |                   |
| KB125                                |                   | 48          | c.15031delG                           | p.Glu5011SerfsX40        | NA                   | <b>This Study</b> |                   |
| KB 43*                               |                   | 49-51       | c.15785-238_16168del2425insTTGTATCTAA |                          | NA                   | <b>This Study</b> |                   |
| KB64                                 |                   | 53          | c.16469_16470delAA                    | p.Lys5490ArgfsX21        | NA                   | 4, #              |                   |
| KB16                                 |                   | 48          | c.15374dupT ^                         | p.Met5124IlefsX14        | de novo              | 9, #              |                   |
| <b>Indels</b>                        |                   | KB274       | 10                                    | c.2532_2591del60         | p.Arg845_Pro864del   | NA                | <b>This Study</b> |
|                                      |                   | KB281       | 39                                    | c.11714_11716dupAGC      | p.Gln3905dup         | Maternal          | <b>This Study</b> |
|                                      |                   | KB71        | 39                                    | c.11819_11836dup18       | p.Leu3940_Gln3945dup | Maternal          | 4, #              |
|                                      |                   | KB227       | 39                                    | c.11843_11860del18       | p.Leu3948_Gln3953del | Paternal          | <b>This Study</b> |
|                                      |                   | KB228       | 39                                    | c.11854_11874dup21       | p.Gln3952_Gln3958dup | Paternal          | <b>This Study</b> |
|                                      | KB77              | 48          | c.15163_15168dupGACCTG                | p.Asp5055_Leu5056dup     | NA                   | 4, #              |                   |
|                                      | KB53              | 53          | c.16489_16491delATC                   | p.Ile5497del             | NA                   | 4, 7, #           |                   |
| <b>Missense</b>                      | KB21              | 3           | c.346T>C                              | p.Ser116Pro              | Maternal             | <b>This Study</b> |                   |
|                                      | KB21              | 4           | c.510G>C                              | p.Gln170His              | Maternal             | 9#                |                   |
|                                      | KB256             | 5           | c.626C>T                              | p.Thr209Ile              | NA                   | <b>This Study</b> |                   |
|                                      | KB269             | 10          | c.1940C>A                             | p.Pro647Gln              | Maternal             | 3                 |                   |
|                                      | KB215             | 11          | c.3392C>T                             | p.Pro1131Leu             | Maternal             | <b>This Study</b> |                   |
|                                      | KB283             | 11          | c.3524C>T                             | p.Thr1175Ile             | NA                   | <b>This Study</b> |                   |

| Mutation Type | ID                                   | Exon/<br>Intron | Mutation                                      | AA change                                | Inheritance          | Reference  |            |
|---------------|--------------------------------------|-----------------|-----------------------------------------------|------------------------------------------|----------------------|------------|------------|
| Splice-site   | KB222                                | 11              | c.3572C>T                                     | p.Pro1191Leu                             | Paternal             | This Study |            |
|               | KB32                                 | 11              | c.3773 G>A                                    | p.Arg1258Gln                             | Paternal             | 4, #       |            |
|               | KB307                                | 14              | c.4171G>A                                     | p.Glu1391Lys                             | NA                   | This Study |            |
|               | KB28                                 | 15              | c.[4249A>G; 4252C>A]                          | p.[Met1417Val; Leu1418Met]               | Maternal             | 4, #       |            |
|               | KB174                                | 15              | c.4283T>C                                     | p.Ile1428Thr                             | Maternal             | This Study |            |
|               | KB138                                | 16              | c.4427C>G                                     | p.Ser1476Cys                             | NA                   | This Study |            |
|               | KB34                                 | 16              | c.4565 A>G                                    | p.Gln1522Arg                             | Paternal             | 4, #       |            |
|               | KB177                                | 22              | c.5226G>C                                     | p.Glu1742Asp                             | NA                   | This Study |            |
|               | KB119, KB204                         | 31              | c.6638 G>A                                    | p.Gly2213Asp                             | Maternal, Maternal   | This Study |            |
|               | KB326                                | 31              | c.6811C>T                                     | p.Pro2271Ser                             | NA                   | This Study |            |
|               | KB107                                | 31              | c.6970C>A                                     | p.Pro2324Thr                             | NA                   | This Study |            |
|               | KB122                                | 31              | c.7829T>C                                     | p.Leu2610Pro                             | Maternal             | 6*         |            |
|               | KB27                                 | 34              | c.8521 C>A                                    | p.Pro2841Thr                             | NA                   | 4, #       |            |
|               | KB326                                | 34              | c.10192A>G                                    | p.Met3398Val                             | NA                   | This Study |            |
|               | KB292                                | 37              | c.10499G>T                                    | p.Gly3500Val                             | de novo              | This Study |            |
|               | KB86                                 | 39              | c.10966C>T                                    | p.Arg3656Cys                             | NA                   | This Study |            |
|               | KB293                                | 39              | c.11794C>G                                    | p.Gln3932Glu                             | NA                   | This Study |            |
|               | KB204                                | 39              | c.12070A>G                                    | p.Lys4024Glu                             | Paternal             | This Study |            |
|               | KB247                                | 39              | c.12485G>A                                    | p.Arg4162Gln                             | NA                   | This Study |            |
|               | KB107                                | 39              | c.12488C>T                                    | p.Pro4163Leu                             | NA                   | This Study |            |
|               | KB170                                | 39              | c.13256C>T                                    | p.Pro4419Leu                             | Maternal             | This Study |            |
|               | KB86                                 | 48              | c.14893G>A                                    | p.Ala4965Thr                             | NA                   | This Study |            |
|               | KB38                                 | 48              | c.[15084C>G; 15100 T>G]                       | p.[Asp5028Glu; Phe5034Val]               | de novo              | 4, #       |            |
|               | KB154, KB185                         | 48              | c.15088C>T                                    | p.Arg5030Cys                             | de novo              | 9          |            |
|               | KB76                                 | 48              | c.15176A>C                                    | p.His5059Pro                             | de novo              | 4, #       |            |
|               | KB129                                | 48              | c.15292A>C                                    | p.Thr5098Pro                             | NA                   | This Study |            |
|               | KB171                                | 48              | c.15565G>A                                    | p.Gly5189Arg                             | Maternal             | 11         |            |
|               | KB264                                | 48              | c.15640C>T                                    | p.Arg5214Cys                             | NA                   | 5, 7, 9    |            |
|               | KB24, KB219                          | 48              | c.15641G>A                                    | p.Arg5214His                             | de novo, NA          | 1, 5       |            |
|               | KB109                                | 48              | c.15649T>C                                    | p.Trp5217Arg                             | de novo              | This Study |            |
|               | KB17                                 | 50              | c.16019 G>A                                   | p.Arg5340Gln                             | de novo              | 4, #       |            |
|               | KB169                                | 51              | c.16273G>A                                    | p.Glu5425Lys                             | de novo              | This Study |            |
|               | KB90                                 | 51              | c.16295G>A                                    | p.Arg5432Gln                             | NA                   | 8          |            |
|               | KB177                                | 52              | c.16412G>T                                    | p.Arg5471Met                             | NA                   | This Study |            |
|               | KB120                                | 54              | c.16528T>G                                    | p.Tyr5510Asp                             | de novo              | This Study |            |
|               | KB286                                | int 2-3         | c.177-2A>C, r.177_400del224                   | p.Ser59ArgfsX86                          | de novo              | This Study |            |
|               | KB31                                 | int 3-4         | c.400+1G>A, r.177_400del224                   | p.Ser59ArgfsX86                          | NA                   | 4, #       |            |
|               | KB20                                 | int 3-4         | c.401-3A>G, r.400_401insAG                    | p.Gly134GlufsX75                         | de novo              | 4, #       |            |
|               | KB210                                | int 17-18       | c.4693+1G>A, r.4681_4693del GTAAAGCCTGTGG     | p.Val1561ArgfsX11                        | de novo              | 10, #      |            |
|               | KB29                                 | int 42-43       | c.13999+5G>A, r.13840_13999del160             | p.Asn4614IlefsX5                         | NA                   | 2, 4, 7, # |            |
|               | KB7                                  | int 44-45       | c.14252-6_14252-5insGAAA, r.14252_14382del131 | p.Val4751_GlufsX22                       | de novo              | 9, #       |            |
|               | KB290                                | int 47-48       | c.14643+1G>A, r.14644_14875del232             | p.Glu4882ProfsX36                        | de novo              | This Study |            |
|               | KB195                                | int 47-48       | c.14644-3C>G, r.14644_14875del232             | p.Gln4882ProfsX36                        | de novo              | This Study |            |
|               | <b>Patients with KDM6A mutations</b> |                 |                                               |                                          |                      |            |            |
|               | Nonsense                             | KB215           | 6                                             | c.514C>T                                 | p.Arg172X            | de novo    | 12         |
|               | Frameshift                           | KB39            | 16                                            | c.1846_1849delACTC                       | p.Thr616TyrfsX8      | NA         | This Study |
|               | Missense                             | KB131           | 20                                            | c.2939A>T                                | p.Asp980Val          | NA         | This Study |
|               | Splice-Site                          | KB127           | int 22-23                                     | c.3284+3_3284+6delAAGT, r.3210_3284del75 | p.Asn1070_Lys1094del | de novo    | This Study |



**Supp. Table S2. In silico prediction of pathogenic effect of KMT2D<sup>#</sup> and KDM6A missense variants**

| ID                     | Exon | Inheritance   | AA change      | POLYPHEN   |       | UMD-predictor         |       | ALIGN<br>GVGD <sup>§</sup> | PROVEAN<br>cutoff=-2.5 | SIFT<br>cutoff=-0.05 |
|------------------------|------|---------------|----------------|------------|-------|-----------------------|-------|----------------------------|------------------------|----------------------|
|                        |      |               |                | prediction | score | prediction            | score |                            |                        |                      |
| <b>KMT2D mutations</b> |      |               |                |            |       |                       |       |                            |                        |                      |
| KB21                   | 4    | inherited (M) | p.Gln170His    | Damaging   | 0.998 | Polymorphism          | 35    | Class C0                   | Neutral                | Damaging             |
| KB256                  | 5    | NA            | p.Thr209Ile    | Benign     | 0.096 | Probably Polymorphism | 59    | Class C0                   | Neutral                | Damaging             |
| KB269                  | 10   | inherited (M) | p.Pro647Gln    | Damaging   | 0.855 | Probably Pathogenic   | 66    | Class C0                   | Neutral                | Tolerated            |
| KB215                  | 11   | inherited (M) | p.Pro1131Leu   | Benign     | 0.196 | Probably Polymorphism | 51    | Class C0                   | Neutral                | Damaging             |
| KB283                  | 11   | NA            | p.Thr1175Ile   | Benign     | 0.022 | Probably Polymorphism | 59    | Class C0                   | Neutral                | Damaging             |
| KB222                  | 11   | inherited (F) | p.Pro1191Leu   | Damaging   | 0.764 | Probably Polymorphism | 51    | Class C25                  | Deleterious            | Damaging             |
| KB32                   | 11   | inherited (F) | p.Arg1258Gln   | Damaging   | 0.997 | Polymorphism          | 44    | Class C35                  | Neutral                | Damaging             |
| KB307                  | 14   | NA            | p.Glu1391Lys   | Damaging   | 1     | Polymorphism          | 29    | Class C65                  | Deleterious            | Damaging             |
| KB28                   | 15   | inherited (M) | p.Met1417Val   | Damaging   | 0.476 | Polymorphism          | 22    | Class C15                  | Neutral                | Tolerated            |
| KB28                   | 15   | inherited (M) | p.Leu1418Met   | Damaging   | 1     | Polymorphism          | 15    | Class C0                   | Neutral                | Damaging             |
| KB174                  | 15   | inherited (M) | p.Ile1428Thr   | Damaging   | 0.889 | Probably Pathogenic   | 73    | Class C65                  | Neutral                | Tolerated            |
| KB138                  | 16   | NA            | p.Ser1476Cys   | Benign     | 0.005 | Polymorphism          | 44    | Class C65                  | Neutral                | Tolerated            |
| KB34                   | 16   | inherited (F) | p.Gln1522Arg   | Damaging   | 0.997 | Probably Polymorphism | 59    | Class C35                  | Deleterious            | Damaging             |
| KB177                  | 22   | NA            | p.Glu1742Asp   | Benign     | 0     | Polymorphism          | 15    | Class C0                   | Neutral                | Tolerated            |
| KB204                  | 31   | inherited (M) | p.Gly2213Asp   | Damaging   | 0.454 | Probably Pathogenic   | 66    | Class C65                  | Neutral                | Damaging             |
| KB119                  | 31   | inherited (M) | p.Gly2213Asp   | Damaging   | 0.454 | Probably Pathogenic   | 66    | Class C65                  | Neutral                | Damaging             |
| KB326                  | 31   | NA            | p.Pro2271Ser   | Benign     | 0.024 | Probably Polymorphism | 59    | Class C65                  | Neutral                | Damaging             |
| KB107                  | 31   | NA            | p.Pro2324Thr   | Damaging   | 0.985 | Probably Pathogenic   | 66    | Class C35                  | Neutral                | Damaging             |
| KB122                  | 31   | inherited (M) | p.Leu2610Pro * | Benign     | 0.076 | Probably Polymorphism | 51    | Class C65                  | Neutral                | Tolerated            |
| KB287                  | 31   | inherited (M) | p.Leu2610Pro * | Benign     | 0.076 | Probably Polymorphism | 51    | Class C65                  | Neutral                | Tolerated            |
| KB27                   | 34   | NA            | p.Pro2841Thr   | Benign     | 0.009 | Probably Pathogenic   | 66    | Class C35                  | Neutral                | Damaging             |
| KB326                  | 34   | NA            | p.Met3398Val   | Benign     | 0     | Polymorphism          | 29    | Class C0                   | Deleterious            | Damaging             |
| KB292                  | 37   | de novo       | p.Gly3500Val   | Damaging   | 0.99  | Pathogenic            | 88    | Class C65                  | Deleterious            | Damaging             |
| KB86                   | 39   | NA            | p.Arg3656Cys   | Damaging   | 1     | Pathogenic            | 81    | Class C65                  | Neutral                | Damaging             |
| KB293                  | 39   | NA            | p.Gln3932Glu   | Benign     | 0.002 | Polymorphism          | 15    | Class C0                   | Neutral                | Damaging             |
| KB204                  | 39   | inherited (F) | p.Lys4024Glu   | Benign     | 0.296 | Polymorphism          | 29    | Class C55                  | Neutral                | Damaging             |
| KB247                  | 39   | NA            | p.Arg4162Gln   | Benign     | 0.003 | Polymorphism          | 48    | Class C0                   | Neutral                | Damaging             |
| KB107                  | 39   | NA            | p.Pro4163Leu   | Damaging   | 0.991 | Probably Polymorphism | 51    | Class C65                  | Neutral                | Damaging             |
| KB170                  | 39   | inherited (M) | p.Pro4419Leu   | Damaging   | 1     | Probably Polymorphism | 51    | Class C65                  | Deleterious            | Damaging             |
| KB86                   | 48   | NA            | p.Ala4965Thr   | Damaging   | 0.941 | Probably Polymorphism | 59    | Class C55                  | Neutral                | Tolerated            |
| KB38                   | 48   | de novo       | p.Asp5028Glu   | Damaging   | 0.999 | Polymorphism          | 22    | Class C35                  | Deleterious            | Damaging             |
| KB154                  | 48   | de novo       | p.Arg5030Cys   | Damaging   | 1     | Pathogenic            | 81    | Class C65                  | Deleterious            | Damaging             |
| KB185                  | 48   | de novo       | p.Arg5030Cys   | Damaging   | 1     | Pathogenic            | 81    | Class C65                  | Deleterious            | Damaging             |
| KB38                   | 48   | NA            | p.Phe5034Val   | Damaging   | 0.999 | Polymorphism          | 44    | Class C45                  | Deleterious            | Damaging             |
| KB76                   | 48   | de novo       | p.His5059Pro   | Damaging   | 1     | Probably Pathogenic   | 73    | Class C65                  | Deleterious            | Damaging             |
| KB129                  | 48   | NA            | p.Thr5098Pro   | Damaging   | 0.992 | Probably Pathogenic   | 66    | Class C35                  | Deleterious            | Tolerated            |
| KB171                  | 48   | inherited (M) | p.Gly5189Arg   | Damaging   | 1     | Pathogenic            | 88    | Class C65                  | Deleterious            | Damaging             |
| KB264                  | 48   | NA            | p.Arg5214Cys   | Damaging   | 1     | Pathogenic            | 81    | Class C65                  | Deleterious            | Damaging             |
| KB219                  | 48   | NA            | p.Arg5214His   | Damaging   | 1     | Polymorphism          | 37    | Class C25                  | Deleterious            | Damaging             |
| KB24                   | 48   | de novo       | p.Arg5214His   | Damaging   | 1     | Polymorphism          | 37    | Class C25                  | Deleterious            | Damaging             |
| KB109                  | 48   | de novo       | p.Trp5217Arg   | Damaging   | 1     | Probably Pathogenic   | 73    | Class C65                  | Deleterious            | Damaging             |
| KB17                   | 50   | de novo       | p.Arg5340Gln   | Damaging   | 1     | Polymorphism          | 37    | Class C35                  | Deleterious            | Damaging             |
| KB169                  | 51   | de novo       | p.Glu5425Lys   | Damaging   | 1     | Polymorphism          | 29    | Class C55                  | Deleterious            | Damaging             |
| KB90                   | 51   | NA            | p.Arg5432Gln   | Damaging   | 1     | Polymorphism          | 44    | Class C35                  | Deleterious            | Damaging             |
| KB177                  | 52   | NA            | p.Arg5471Met   | Damaging   | 1     | Pathogenic            | 100   | Class C0                   | Deleterious            | Damaging             |
| KB120                  | 54   | de novo       | p.Tyr5510Asp   | Damaging   | 1     | Pathogenic            | 81    | Class C0                   | Deleterious            | Damaging             |
| <b>KDM6A mutations</b> |      |               |                |            |       |                       |       |                            |                        |                      |
| KB131                  | 20   | de novo       | p.Asp980Val    | Damaging   | 1     | NA                    | NA    | Class C65                  | Deleterious            | Damaging             |

\* Kabuki-unrelated mutation, found in diffuse large B-cell lymphoma.

# RefSeq NM\_003482.3

§ the score ranges from C0 (least likely interfere with function) to C65 (most likely interfere with function)

**Supp. Table S3. Values of the measured quantities and *p*-values****A**

| Sample | KMT2D             |
|--------|-------------------|
| KB44   | 0,455* (p=0,0003) |
| KB45   | 0,452* (p=0,0003) |
| KB83   | 0,386* (p=0,0002) |
| KB41   | 0,657 (p=0,0020)  |
| KB48   | 0,352 (p=0,0001)  |
| KB82   | 0,634 (p=0,0020)  |
| KB186  | 0,702* (p=0,0020) |
| KB153  | 0,579* (p=0,0013) |
| KB3    | 0,660* (p=0,0015) |

**B**

| Sample | HOXC6             | S100A2            | S100A4            | S100A5            | S100A6            |
|--------|-------------------|-------------------|-------------------|-------------------|-------------------|
| KB41   | 0,144* (p=0,0001) | 0,954 (p=0,83620) | 0,896 (p=0,0409)  | 0,798 (p=0,0043)  | 1,037 (p=0,0271)  |
| KB44   | 0,427* (p=0,0003) | 0,608* (p=0,0011) | 0,423* (p=0,0000) | 0,665* (p=0,0018) | 0,241* (p=0,0000) |
| KB45   | 0,034* (p=0,0000) | 0,259* (p=0,0001) | 0,847* (p=0,0054) | 0,662* (p=0,0026) | 0,587* (p=0,0000) |
| KB48   | 0,560* (p=0,0007) | 0,545* (p=0,0012) | 0,634* (p=0,0002) | 0,381* (p=0,0002) | 0,296* (p=0,0000) |
| KB82   | 0,052* (p=0,0010) | 0,563* (p=0,0008) | 0,574* (p=0,0000) | 1,258 (p=0,1348)  | 0,889 (p=0,0129)  |
| KB290  | 0,297* (p=0,0003) | 0,844 (p=0,0537)  | 0,582* (p=0,0003) | 0,708* (p=0,0062) | 0,683* (p=0,0000) |

**C**

| Sample   | HOXC6             |
|----------|-------------------|
| KB153    | 0,167* (p=0,0003) |
| KB186    | 0,859 (p=0,012)   |
| KB3      | 0,609* (p=0,0009) |
| KB153+E2 | 0,324* (p=0,0000) |
| KB186+E2 | 0,607* (p=0,0003) |
| KB3+E2   | 0,776* (p=0,009)  |

**D**

| Sample   | Luciferase activity |
|----------|---------------------|
| KB153    | 0,293* (p=0,0003)   |
| KB186    | 0,904 (p=0,0201)    |
| KB3      | 0,579* (p=0,0021)   |
| KB153+E2 | 0,156* (p=0,0003)   |
| KB186+E2 | 0,519* (p=0,0002)   |
| KB3+E2   | 0,375* (p=0,0013)   |

**E**

| Sample | KMT2D             |
|--------|-------------------|
| KB153  | 2,935* (p=0,0000) |
| KB186  | 2,186* (p=0,0000) |
| KB3    | 4,010* (p=0,0006) |

**F**

| Sample | KMT2D             |
|--------|-------------------|
| KB44   | 1,192 (p=0,011)   |
| KB45   | 1,345 (p=0,011)   |
| KB48   | 1,932* (p=0,0000) |
| KB83   | 1,691* (p=0,0001) |

(A) Protein level of KMT2D in 6 KS-LCL and 3 KS-fibroblast cell lines as showed in Figure 1A-F; (B) *HOXC6*, *S100A2*, *S100A4*, *S100A5*, *S100A6* expression level in 6 KS-LCL cells reported in Figure 1G; (C) *HOXC6* transcriptional level in 3 KS-fibroblast cells treated or not with E2 (Figure 2A-B); (D) Luciferase activity in 3 KS-fibroblast cells transfected with pGL3-ERE1-ERE2 luciferase-based reporter vector containing the *HOXC6* EREs sequences, treated or not with E2 reported in Figure 2C-E; (E-F) mRNA levels of *KMT2D* in 3 KS-fibroblast (E) and 4 KS-LCL lines (F) following treatment with puromycin (Supp. Figure S3A and C). *p*-values <0.01 are marked by asterisk.

**Supp. Table S4. Basal and gentamicin-induced readthrough for KB mutations**

| Gene  | WT codon          | Mutation   | Nt change  | Nucleotidic context of stop mutation         | Readthrough at gentamicin (µg/ml)=% |        |        |        | Increase factor between doses 0 and 600 | Increase factor between doses 0 and 800 | Increase factor between doses 0 and 1200 |
|-------|-------------------|------------|------------|----------------------------------------------|-------------------------------------|--------|--------|--------|-----------------------------------------|-----------------------------------------|------------------------------------------|
|       |                   |            |            |                                              | 0                                   | 600    | 800    | 1200   |                                         |                                         |                                          |
| KMT2D | TAT               | p.Tyr223X  | c.669T>G   | TGGGAGGGGGCTGCAT <b>TAG</b> CTGGAGGAGGCTCCA  | 0,002                               | 0,009* | 0,004  | 0,004  | 4                                       | 2                                       | 2                                        |
| KMT2D | TGG               | p.Tip1473X | c.4419G>A  | TGGTGGAAAGTGCAAG <b>TGAT</b> GTGTGTCCTGT CCA | 0,187                               | 0,104  | 0,089  | 0,096  | 1                                       | 0                                       | 1                                        |
| KMT2D | CGA               | p.Arg2099X | c.6295 C>T | TGGCGTAAGACTGACT <b>TG</b> ACCGGCCCTACATCCA  | 0,022                               | 0,398* | 0,436* | 0,356* | 18                                      | 19                                      | 16                                       |
| KMT2D | CAG               | p.Gln2416X | c.7246C>T  | TGGCCTGCCAGTCC <b>T</b> TAGTCCCAGTCCAGCCCA   | 0,013                               | 0,037* | 0,047* | 0,062* | 3                                       | 4                                       | 5                                        |
| KMT2D | CGA               | p.Arg2635X | c.7903C>T  | TGGGGAGCCCTCACAG <b>TGAT</b> CAGGCATCACC CCA | 0,015                               | 0,147* | 0,135* | 0,267* | 10                                      | 9                                       | 18                                       |
| KMT2D | GAA               | p.Glu2646X | c.7936C>T  | TGGGTCGAAAAGCGA <b>T</b> AAGACCCAGGGACTCCA   | 0,008                               | 0,019* | 0,026* | 0,026* | 3                                       | 3                                       | 3                                        |
| KMT2D | CGA               | p.Arg3321X | c.9961C>T  | TGGCTTGCAGGTGCC <b>TG</b> ACAGCCAGGTTTGCCA   | 0,082                               | 0,681* | 0,887* | 0,985* | 8                                       | 11                                      | 12                                       |
| KMT2D | CAG               | p.Gln3379X | c.10135C>T | TGGCCAGTGTATC <b>A</b> TAGAAGCCATGGGCCCA     | 0,003                               | 0,008* | 0,011* | 0,013* | 2                                       | 3                                       | 3                                        |
| KMT2D | CAG               | p.Gln3584X | c.10750C>T | TGGCAGTCCGGA <b>A</b> TAGCAGAAGGAGCACCCA     | 0,049                               | 0,213* | 0,241* | 0,269* | 4                                       | 5                                       | 6                                        |
| KMT2D | CGA               | p.Arg3707X | c.11119C>T | TGGAACCTTGCTCT <b>T</b> TGAAGCCTCGGACCTCCA   | 0,014                               | 0,079* | 0,099* | 0,098* | 6                                       | 7                                       | 7                                        |
| KMT2D | CAG               | p.Gln3757X | c.11269C>T | TGGATCCAGCAGCAA <b>T</b> AGCAGCAGGGTCTCCA    | 0,015                               | 0,141* | 0,117* | 0,249* | 10                                      | 8                                       | 17                                       |
| KMT2D | CAG               | p.Gln4092X | c.12274C>T | TGGTCTCTGCAGCT <b>T</b> AGCCACCTCTGAGGCCA    | 0,080                               | 0,135  | 0,145  | 0,152  | 2                                       | 2                                       | 2                                        |
| KMT2D | CGA               | p.Arg4282X | c.12844C>T | TGGGGGGCAGGGC <b>T</b> TGACCTCAGGGCCACCA     | 0,036                               | 0,545* | 0,652* | 0,967* | 15                                      | 18                                      | 27                                       |
| KMT2D | CGA               | p.Arg5027X | c.15079C>T | TGGGACAAAGTACCG <b>T</b> GACATGCCTCGCCCA     | 0,090                               | 0,119  | 0,103  | 0,168  | 1                                       | 1                                       | 2                                        |
| KDM6A | CGA               | p.Arg519X  | c.1555C>T  | TGGTTGCACAGGT <b>A</b> TGATCTACTGGAATCCA     | 0,018                               | 0,069* | 0,061* | 0,072* | 4                                       | 3                                       | 4                                        |
| KDM6A | TGG               | p.Trp1239X | c.3717G>A  | TGGAACAACATTGCT <b>T</b> GAAATGTTGGTCCACCA   | 0,006                               | 0,000  | 0,001  | 0,001  | 0                                       | 0                                       | 0                                        |
|       | TQ: in frame Ctrl |            |            | GCAGGAACACAAACAGCAATTACAG                    | 18,122                              | 14,865 | 15,635 | 12,372 | 1                                       | 1                                       | 1                                        |
|       | CGA <sup>^</sup>  | p.Ser319X  | c.956C>G   | AGCCCATTTCTTGACAGCATTGGAA                    | 0,027                               | 0,299* | 0,344* | 0,454* | 11                                      | 13                                      | 17                                       |

The readthrough response was defined as the factor of increase between basal and gentamicin-induced readthrough levels.

TQ: construct with no stop codon (100% of activity)

<sup>^</sup>: Duchenne muscular dystrophy gene mutation used as positive control

<sup>°</sup>: Miyake, et al., 2013b

\*: *p-value* <0.01
